# Supplementary material
Source: PubMed Central journal article supplement (PMC4342690)
Supplement: supp_dyu172_ije-2013-12-1330.pdf [file supp_dyu172_ije-2013-12-1330.pdf]

Supplemental Tables and Figures.

Supplemental Table. Impact of interaction between EITC disbursement month and qualifying for any EITC in Difference-in-Difference Models, by gender, NHANES III (n=6925).

|                               | WOMEN (n=3571) |               |               | MEN (n=3354)  |               |               |
|-------------------------------|----------------|---------------|---------------|---------------|---------------|---------------|
|                               | Coef/OR        | 95% CI        |               | Coef/OR       | 95% CI        |               |
| <b>DIET</b>                   |                |               |               |               |               |               |
| overall diet                  | 0.047          | -0.113        | 0.208         | <b>-0.230</b> | <b>-0.360</b> | <b>-0.100</b> |
| vegetables                    | -0.146         | -0.302        | 0.010         | -0.007        | -0.205        | 0.190         |
| fruit                         | 0.112          | -0.027        | 0.251         | <b>-0.414</b> | <b>-0.560</b> | <b>-0.269</b> |
| meat                          | <b>-0.335</b>  | <b>-0.527</b> | <b>-0.143</b> | -0.034        | -0.203        | 0.136         |
| dairy                         | 0.202          | -0.027        | 0.432         | -0.064        | -0.303        | 0.174         |
| sodium                        | 0.156          | -0.025        | 0.337         | <b>-0.277</b> | <b>-0.510</b> | <b>-0.043</b> |
| saturated fat                 | -0.177         | -0.358        | 0.004         | -0.100        | -0.283        | 0.082         |
| diet variety                  | 0.198          | -0.010        | 0.405         | -0.011        | -0.192        | 0.169         |
| <b>FOOD SECURITY</b>          |                |               |               |               |               |               |
| not enough food†              | 0.983          | 0.966         | 1.000         | 0.983         | 0.964         | 1.002         |
| not money for food†           | 0.985          | 0.968         | 1.003         | 0.983         | 0.965         | 1.003         |
| <b>HEALTH BEHAVIORS</b>       |                |               |               |               |               |               |
| smoking†                      | <b>0.984</b>   | <b>0.977</b>  | <b>0.992</b>  | 1.006         | 0.998         | 1.014         |
| not trying to lose weight†    | <b>0.979</b>   | <b>0.966</b>  | <b>0.992</b>  | <b>0.975</b>  | <b>0.964</b>  | <b>0.985</b>  |
| cotinine                      | -0.011         | -0.220        | 0.197         | <b>-0.542</b> | <b>-0.721</b> | <b>-0.364</b> |
| marijuana†                    | <b>0.996</b>   | <b>0.995</b>  | <b>0.998</b>  | <b>0.994</b>  | <b>0.992</b>  | <b>0.996</b>  |
| alcohol                       | -0.016         | -0.174        | 0.142         | -0.082        | -0.399        | 0.235         |
| not walk mile week†           | 0.999          | 0.997         | 1.001         | 1.002         | 0.998         | 1.006         |
| <b>CARDIOVASCULAR</b>         |                |               |               |               |               |               |
| systolic blood pressure       | -0.030         | -0.140        | 0.081         | 0.069         | -0.091        | 0.229         |
| diastolic blood pressure      | <b>-0.096</b>  | <b>-0.179</b> | <b>-0.014</b> | 0.039         | -0.081        | 0.158         |
| forced expiratory volume      | -0.011         | -0.129        | 0.107         | 0.015         | -0.147        | 0.177         |
| pulse rate                    | -0.019         | -0.236        | 0.198         | 0.035         | -0.208        | 0.278         |
| <b>METABOLIC</b>              |                |               |               |               |               |               |
| HDL cholesterol               | -0.046         | -0.238        | 0.146         | -0.116        | -0.294        | 0.062         |
| LDL cholesterol               | -0.021         | -0.263        | 0.221         | -0.125        | -0.372        | 0.122         |
| triglycerides                 | 0.044          | -0.129        | 0.217         | 0.157         | -0.060        | 0.375         |
| hemoglobin A1c                | 0.039          | -0.102        | 0.180         | <b>0.157</b>  | <b>0.022</b>  | <b>0.292</b>  |
| glucose                       | 0.032          | -0.052        | 0.116         | 0.068         | -0.024        | 0.161         |
| <b>INFECTION AND IMMUNITY</b> |                |               |               |               |               |               |
| C-reactive protein            | 0.008          | -0.144        | 0.159         | -0.094        | -0.194        | 0.007         |
| lymphocytes                   | -0.184         | -0.322        | -0.046        | -0.040        | -0.233        | 0.153         |
| illness†                      | 1.000          | 0.998         | 1.002         | 1.000         | 0.998         | 1.002         |
| respiratory infection†        | 1.001          | 1.000         | 1.003         | 1.000         | 0.999         | 1.001         |
| cold†                         | <b>0.991</b>   | <b>0.983</b>  | <b>0.998</b>  | 0.996         | 0.991         | 1.002         |

Table footnote: Coefficients shown in table are from interaction term of disbursement month X any EITC benefit. All continuous dependent variables are Z scored. Positive coefficients indicate association with worse health. Coefficients for dichotomous outcomes (indicated with a †) are presented as odds ratios. Odds ratios above one indicate association with worse health. Coefficients and 95% confidence intervals are bolded when the 95% confidence interval does not include the level of the coefficient indicating no association.

Supplemental Figure. Distribution of earned income in those receiving less than \$1000 EITC credit (left, n=437), and those receiving \$1000 or more in EITC credit (middle, n=1788) and those receiving no EITC credit (right, n=4700).

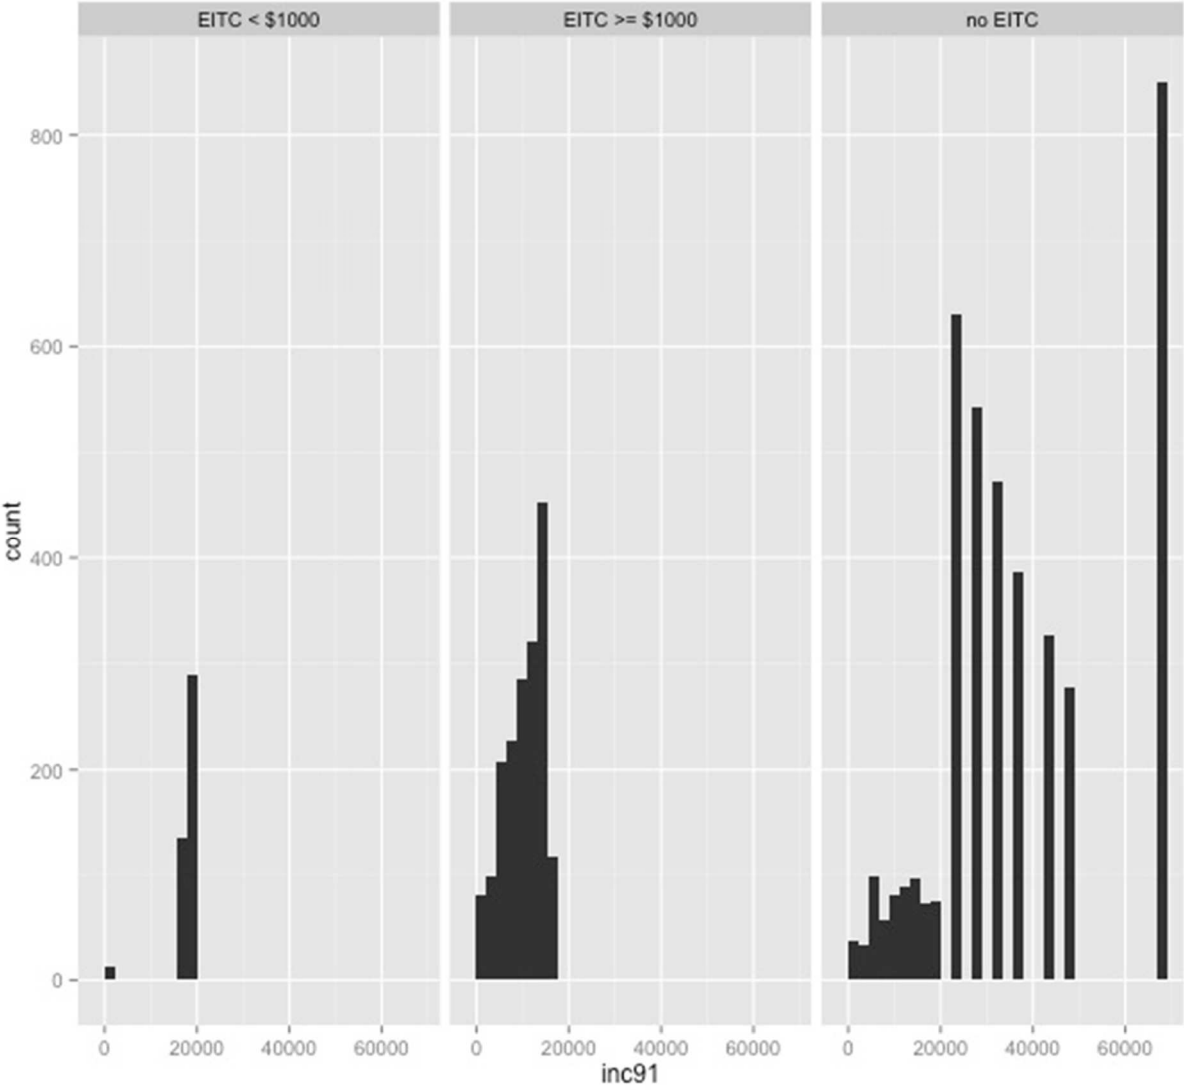

Figure footnote: Non-continuous distribution of earnings reflects the collection of categorical earnings data in NHANES, and the large frequency at \$67 000 per year is the top-coded category of earnings. This top-coding does not impact the calculation of EITC benefits because all of these individuals are out of the range of qualification.
